# Supplementary material for: Genome-wide comparative analysis in Solanaceous species reveals evolution of microRNAs targeting defense genes in Capsicum spp
Source: PubMed Central journal article supplement — DNA Res. 2018 Jul 27;25(6):561–75. doi: 10.1093/dnares/dsy025 (PMC6289781; doi:10.1093/dnares/dsy025), 2018-07-27
Supplement: dsy025_supplementary_figure_1.pdf [file dsy025_supplementary_figure_1.pdf]

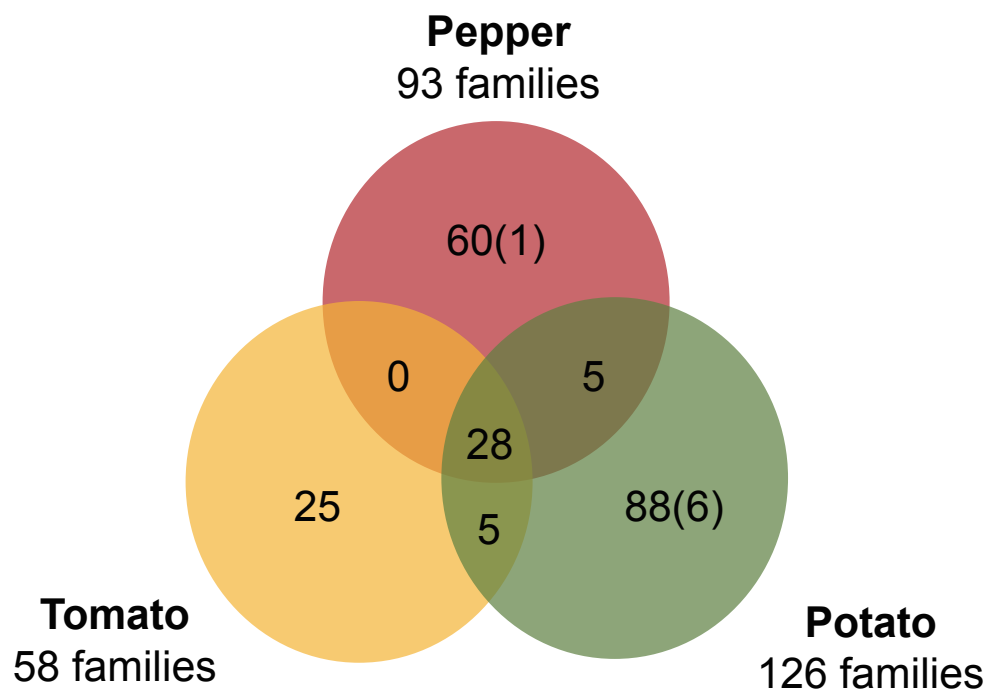

**Figure S1. miRNA classification in *Solanaceae***

A venn diagram showed shared miRNA families in *Solanaceae*. The numbers in the parenthesis indicate miRNAs which are conserved in other plant species.
