# Supplementary material for: Genome-wide comparative analysis in Solanaceous species reveals evolution of microRNAs targeting defense genes in Capsicum spp
Source: PubMed Central journal article supplement — DNA Res. 2018 Jul 27;25(6):561–75. doi: 10.1093/dnares/dsy025 (PMC6289781; doi:10.1093/dnares/dsy025), 2018-07-27
Supplement: dsy025_supplementary_figure_2.pdf [file dsy025_supplementary_figure_2.pdf]

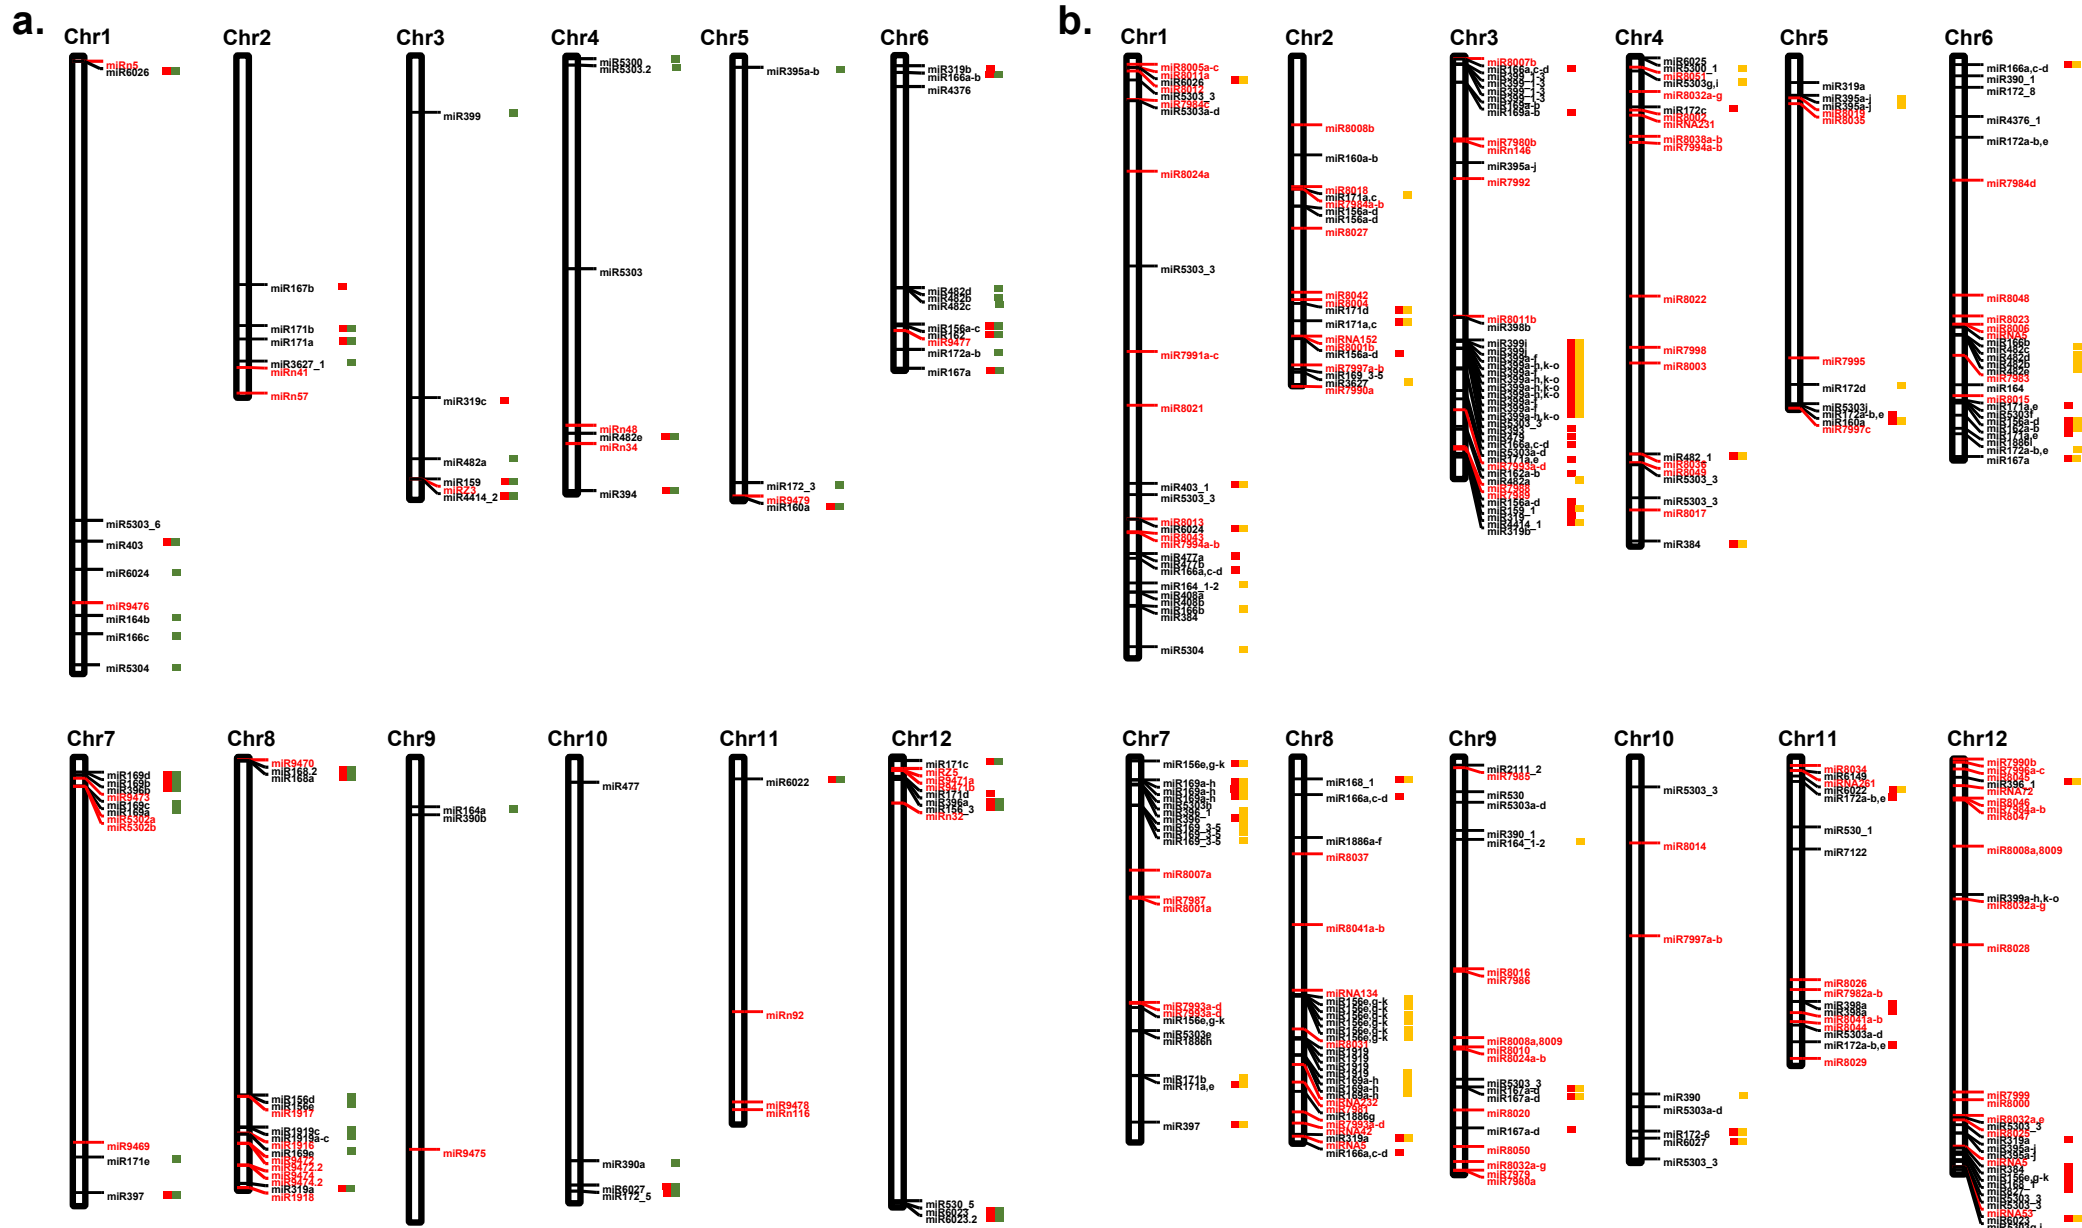

**Figure S2. Genomic location of miRNA genes in tomato (left) and potato (right)**

Black boxes indicate 12 pseudomolecules of tomato and potato. miRNA genes in black and red indicate the locations of conserved and species-specific miRNA genes, respectively. Red, green and yellow boxes next to miRNAs indicate the miRNA genes and their flanking protein-coding sequences have microsynteny with those of pepper (red), potato (green) and tomato (yellow), respectively. Note, we represented overlapped miRNA genes as a merged one to avoid exaggerating the number of miRNA genes.
