# Supplementary material for: Genome-wide comparative analysis in Solanaceous species reveals evolution of microRNAs targeting defense genes in Capsicum spp
Source: PubMed Central journal article supplement — DNA Res. 2018 Jul 27;25(6):561–75. doi: 10.1093/dnares/dsy025 (PMC6289781; doi:10.1093/dnares/dsy025), 2018-07-27
Supplement: dsy025_supplementary_figure_3.pdf [file dsy025_supplementary_figure_3.pdf]

T=TC.CA05g06820 (CNL)\_Q=can-miR482c\_S=1607

category=0\_p=0.00375004838040716

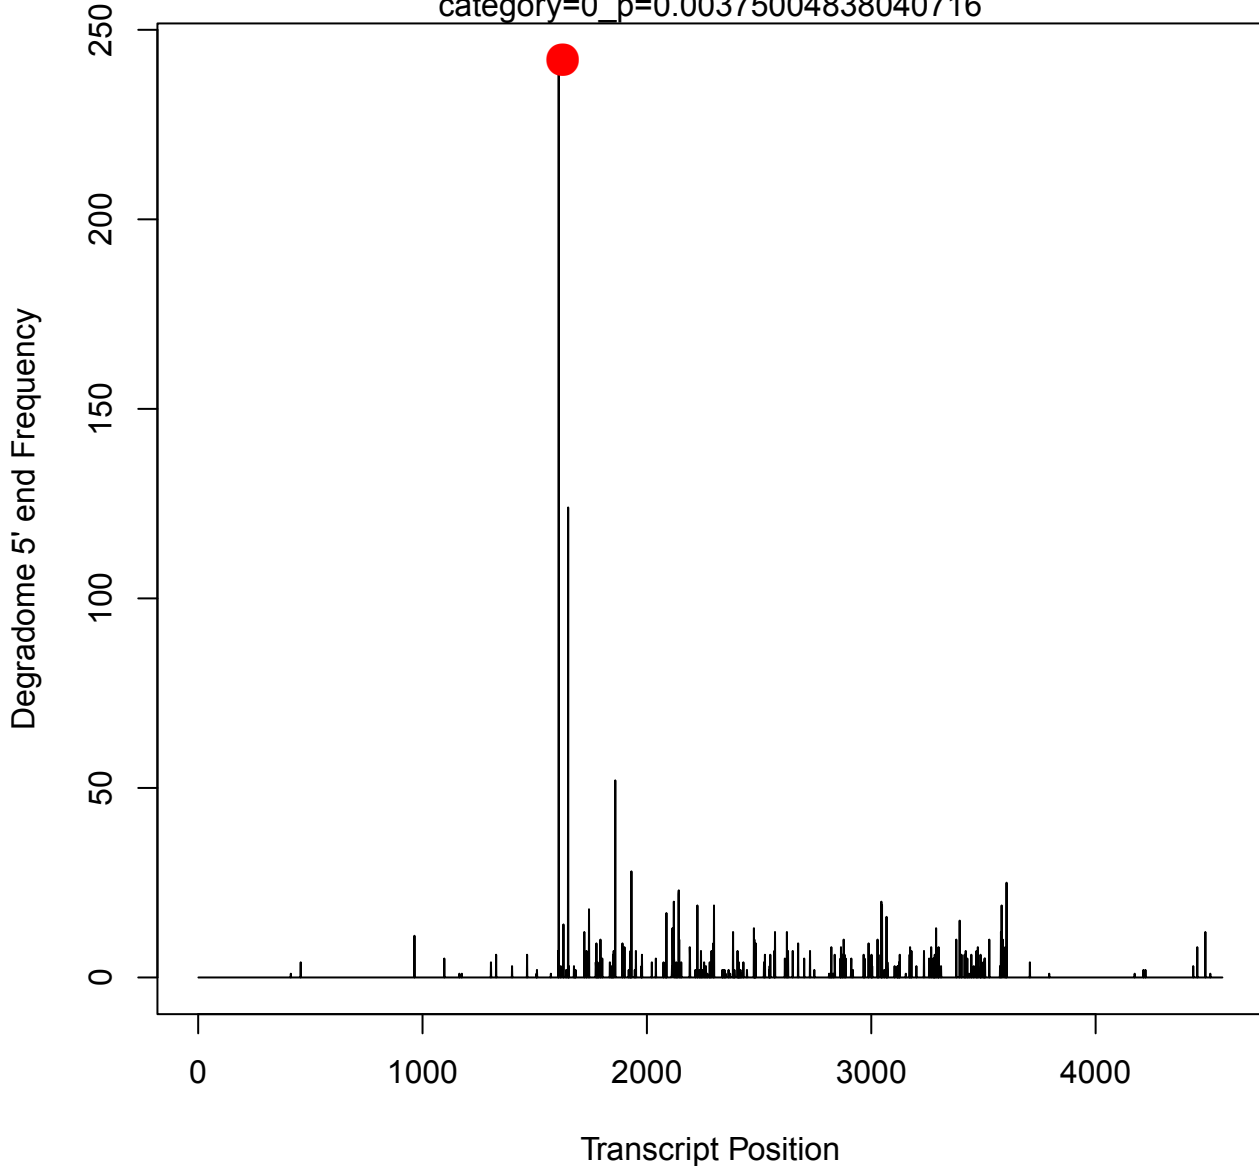

T=TC.CA11g01410 (CNL)\_Q=can-miR6027-3p\_S=2360

category=0\_p=0.0683132896105783

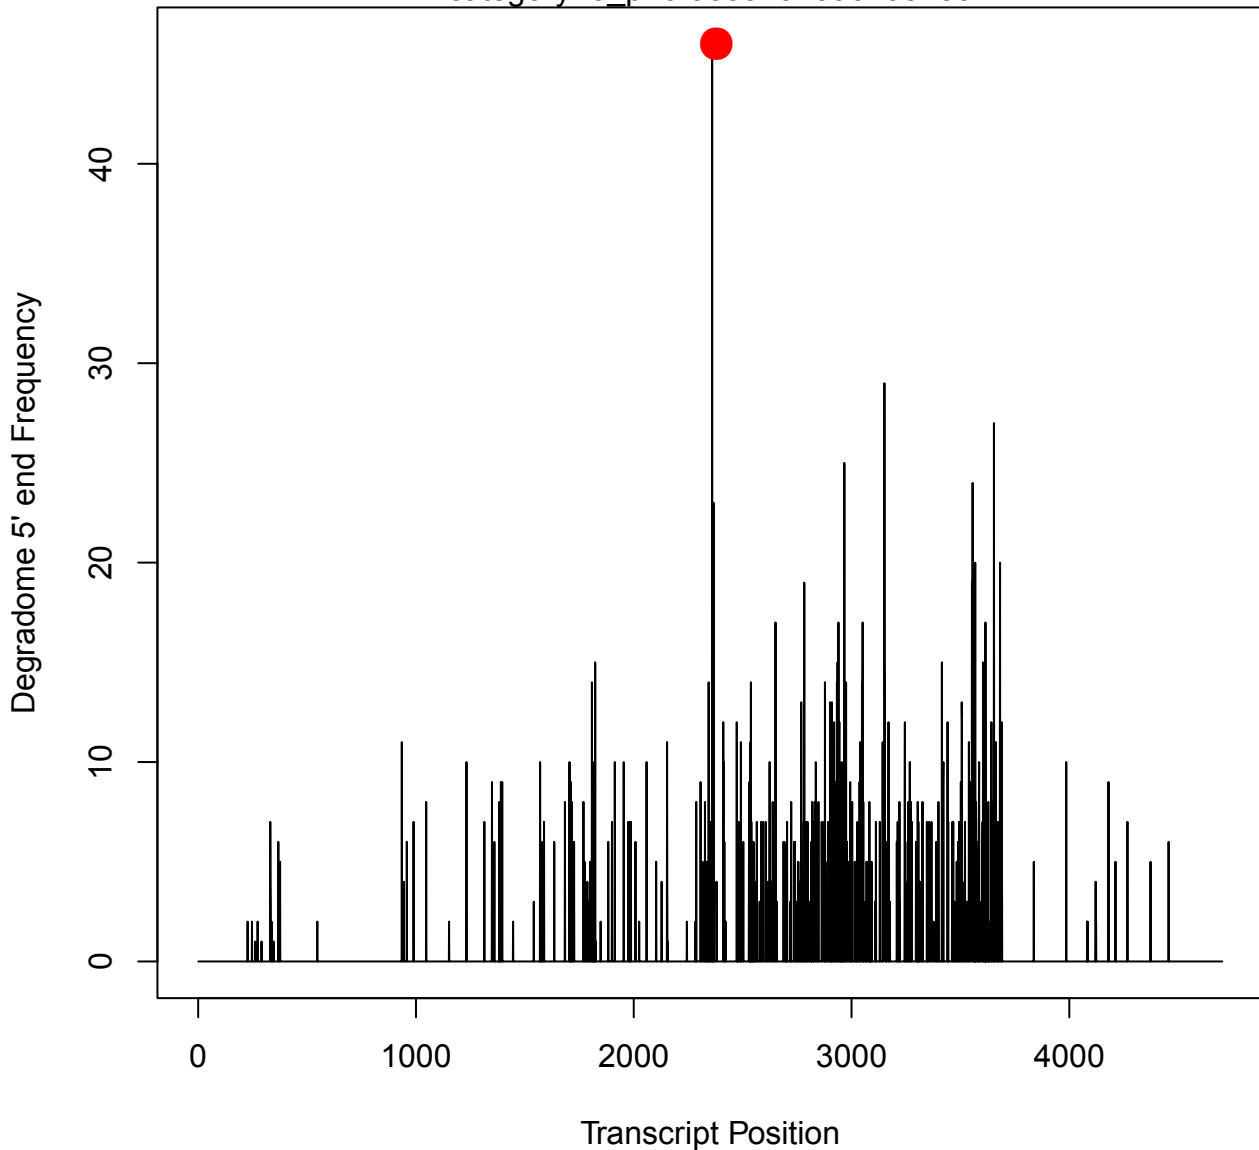

T=TC.CA08g01140 (RLP)\_Q=can-miR-n026\_S=3509

category=0\_p=0.00437368779436897

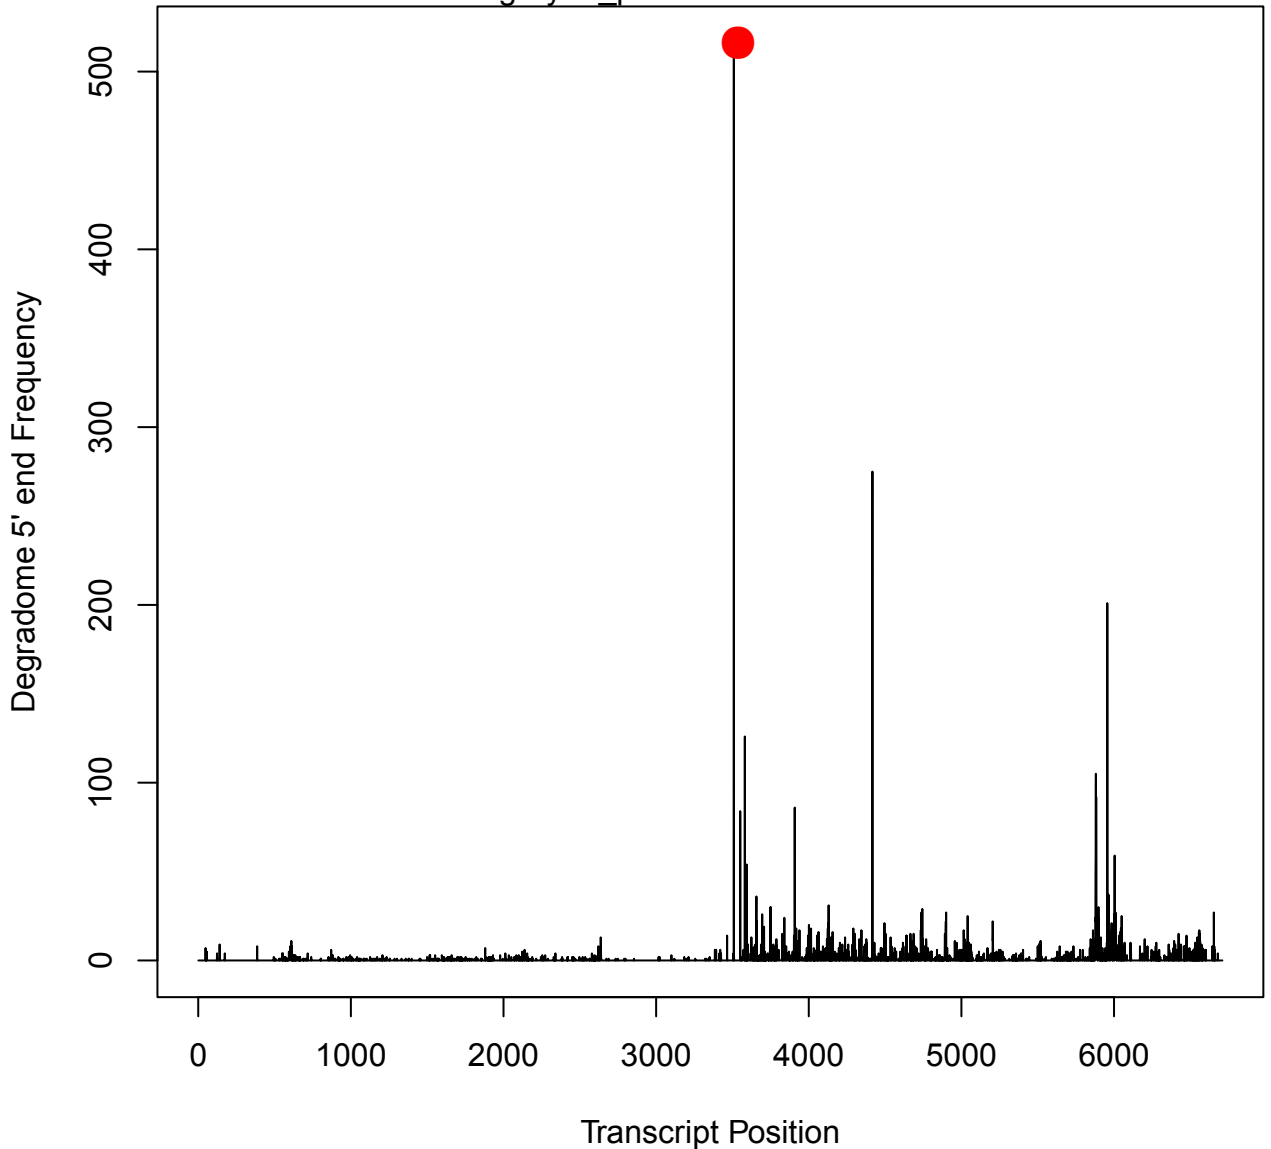

T=TC.CA06g02150 (CNL)\_Q=can-miR-n033a\_S=3384

category=0\_p=0.001876785351832

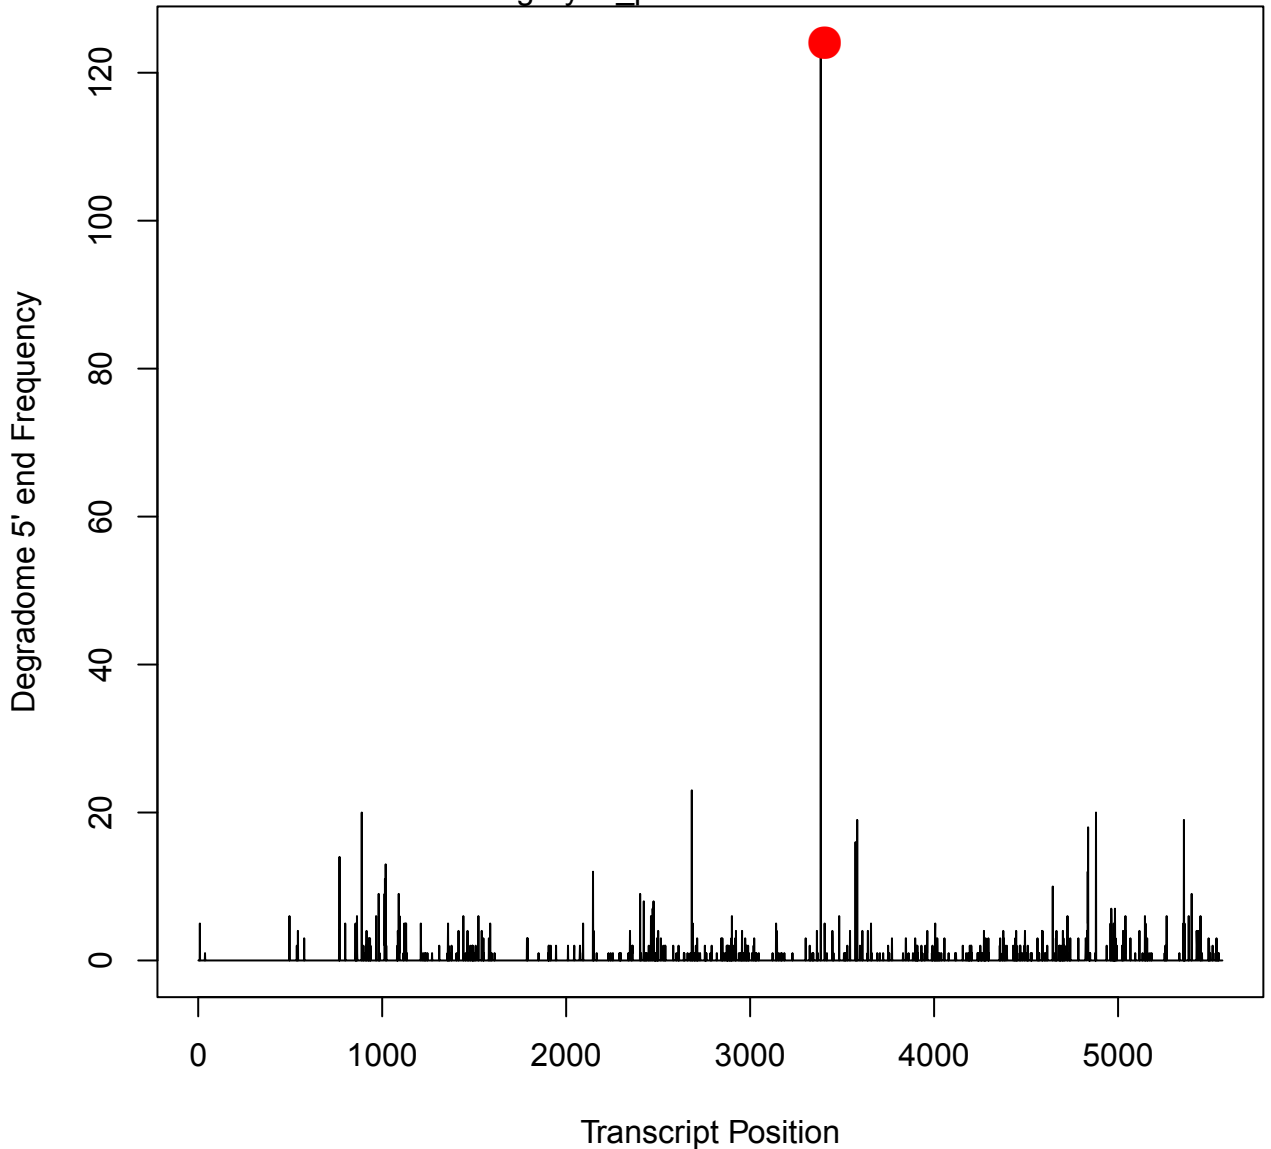

T=TC.CA03g01330 (CNL)\_Q=can-miR6024-3p\_S=2621

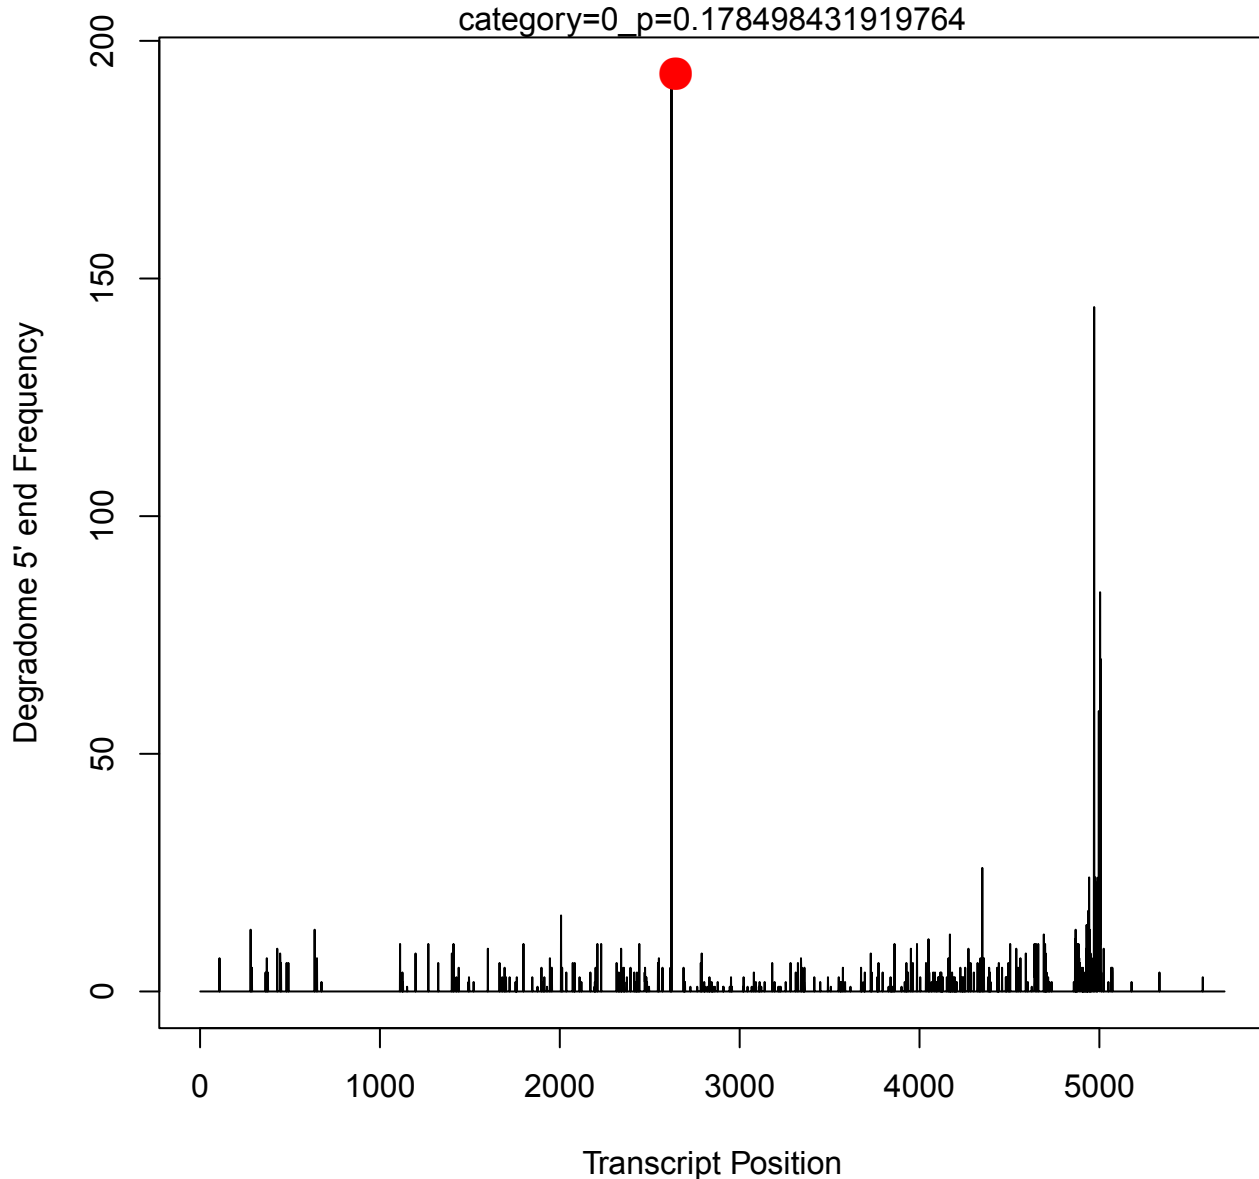

**Figure S3. Representative examples of miRNAs cleaving disease-resistance genes**

Plot shows the result of degradome analysis. X-axis and y-axis indicate the 5' end position of the mapped degradome reads and abundance of mapped degradome reads, respectively. Red dot indicates the cleavage site in the transcript by miRNA.
