# Supplementary material for: Genome-wide comparative analysis in Solanaceous species reveals evolution of microRNAs targeting defense genes in Capsicum spp
Source: PubMed Central journal article supplement — DNA Res. 2018 Jul 27;25(6):561–75. doi: 10.1093/dnares/dsy025 (PMC6289781; doi:10.1093/dnares/dsy025), 2018-07-27
Supplement: dsy025_supplementary_figure_4.pdf [file dsy025_supplementary_figure_4.pdf]

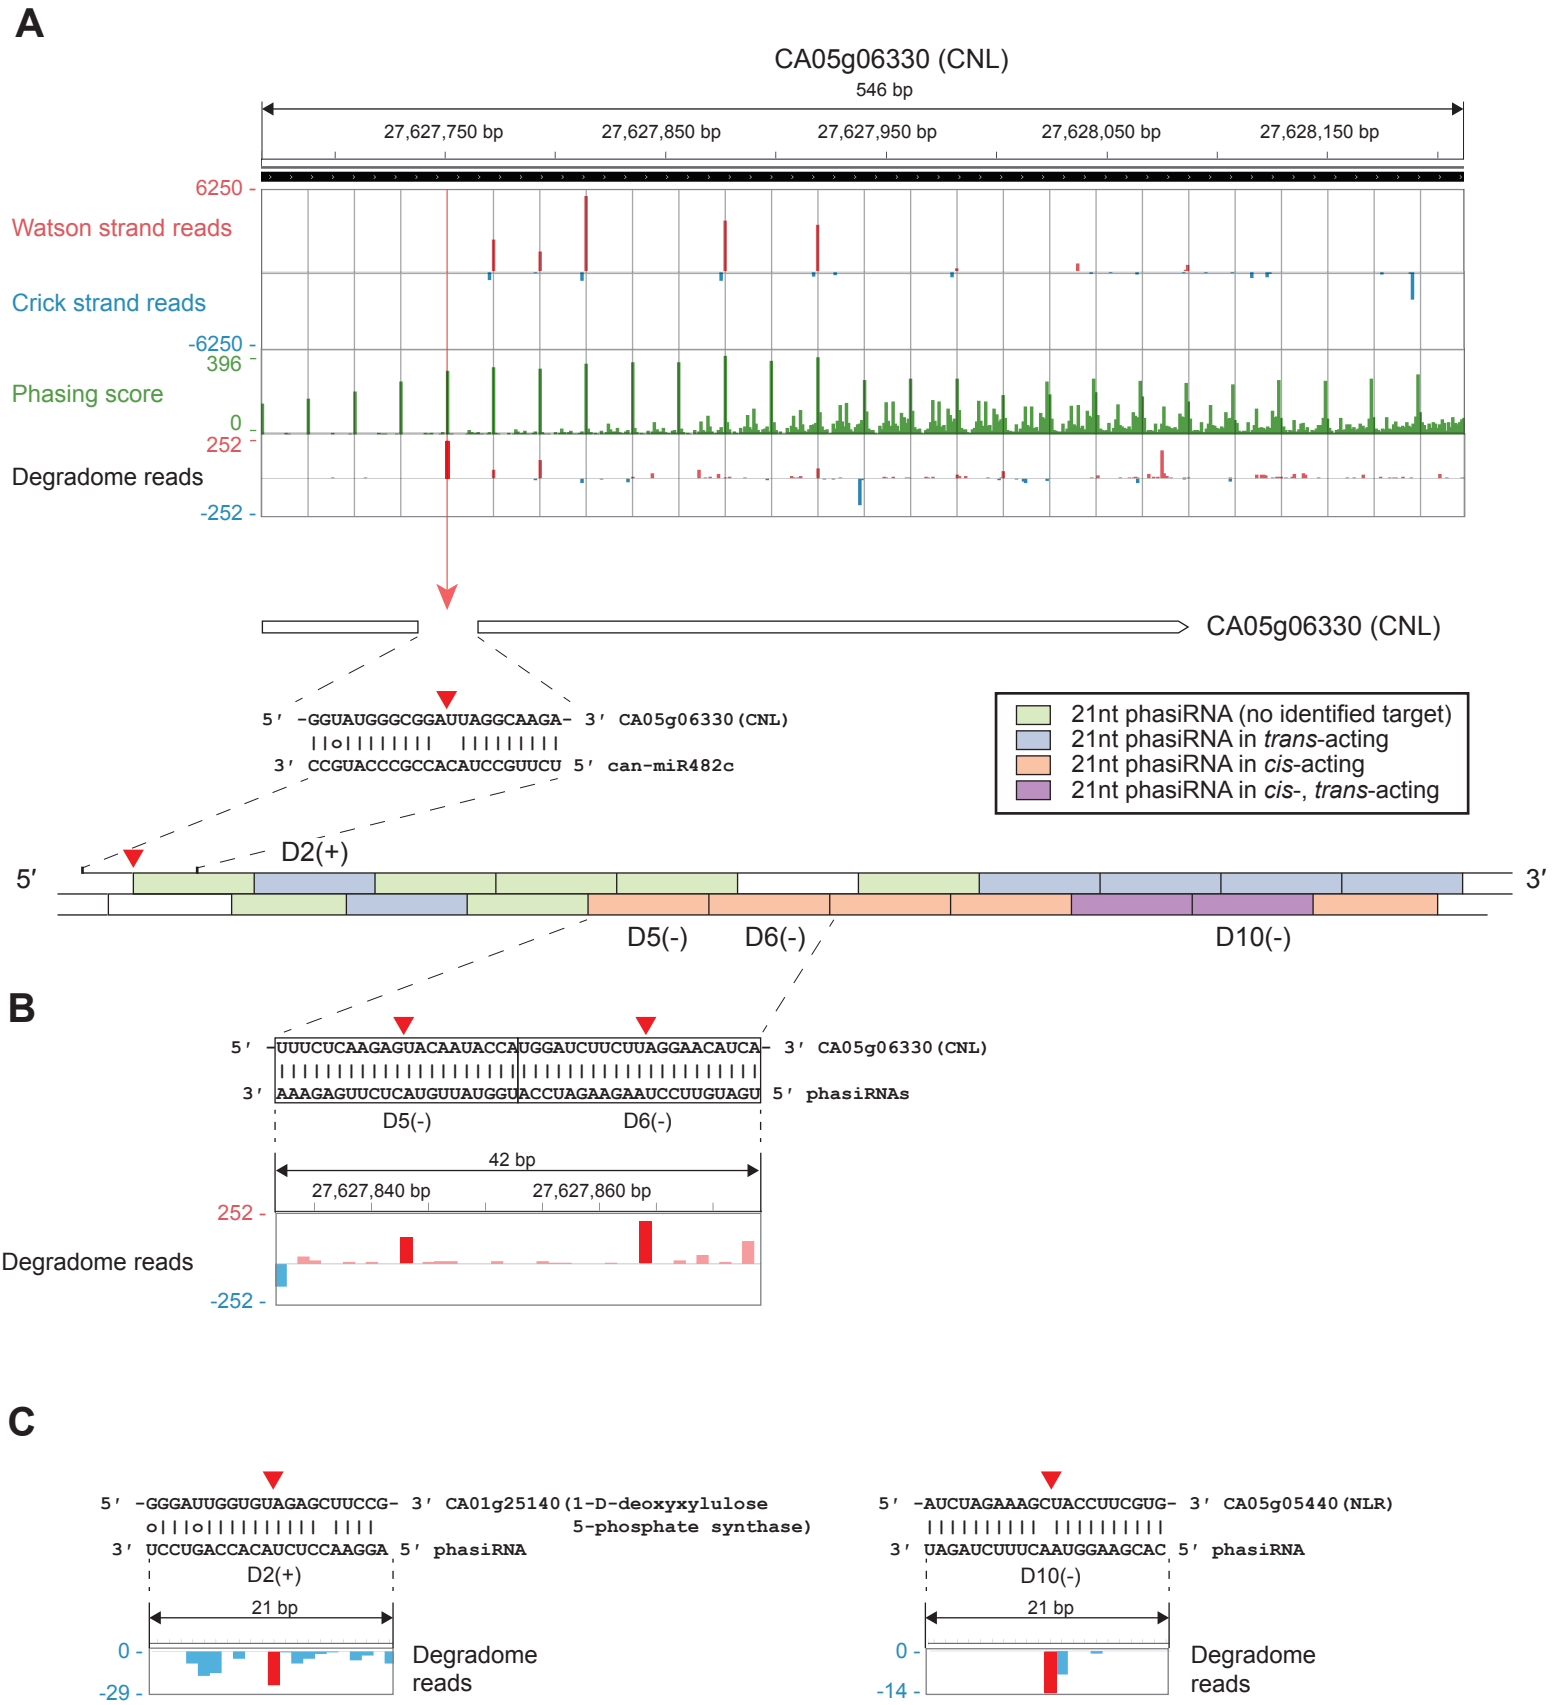

**Figure S4. can-miR482c induces phasiRNA biogenesis by cleaving CNL**

(A) Mapping results of small RNA and degradome reads normalized by mapping count to the genome and phasing score data were viewed using IGV. Red arrow indicates the cleavage site by can-miR482c. Examples of (B) cis-acting phasiRNAs and (C) trans-acting phasiRNAs. Red triangles indicate the cleavage sites by small RNAs. In degradome reads panel, pale red color indicates reads mapped to Watson strand and blue color indicates those mapped to Crick strand in the genome.
