# Supplementary material for: Genome-wide comparative analysis in Solanaceous species reveals evolution of microRNAs targeting defense genes in Capsicum spp
Source: PubMed Central journal article supplement — DNA Res. 2018 Jul 27;25(6):561–75. doi: 10.1093/dnares/dsy025 (PMC6289781; doi:10.1093/dnares/dsy025), 2018-07-27
Supplement: dsy025_supplementary_figure_7.pdf [file dsy025_supplementary_figure_7.pdf]

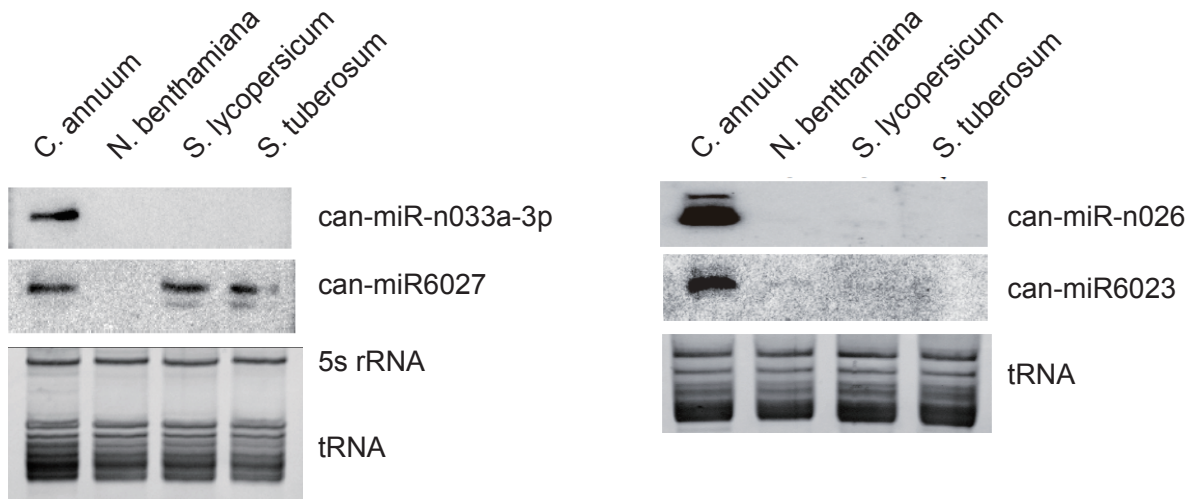

## Figure S7. Validation of the disease-resistance related miRNAs via northern blot.

Total RNA was extracted from leaf of pepper, tomato, potato and *Nicotiana benthamiana*. tRNAs are shown as a loading control.
