# Supplementary material for: Genome-wide comparative analysis in Solanaceous species reveals evolution of microRNAs targeting defense genes in Capsicum spp
Source: PubMed Central journal article supplement — DNA Res. 2018 Jul 27;25(6):561–75. doi: 10.1093/dnares/dsy025 (PMC6289781; doi:10.1093/dnares/dsy025), 2018-07-27
Supplement: dsy025_supplementary_figure_10.pdf [file dsy025_supplementary_figure_10.pdf]

**A**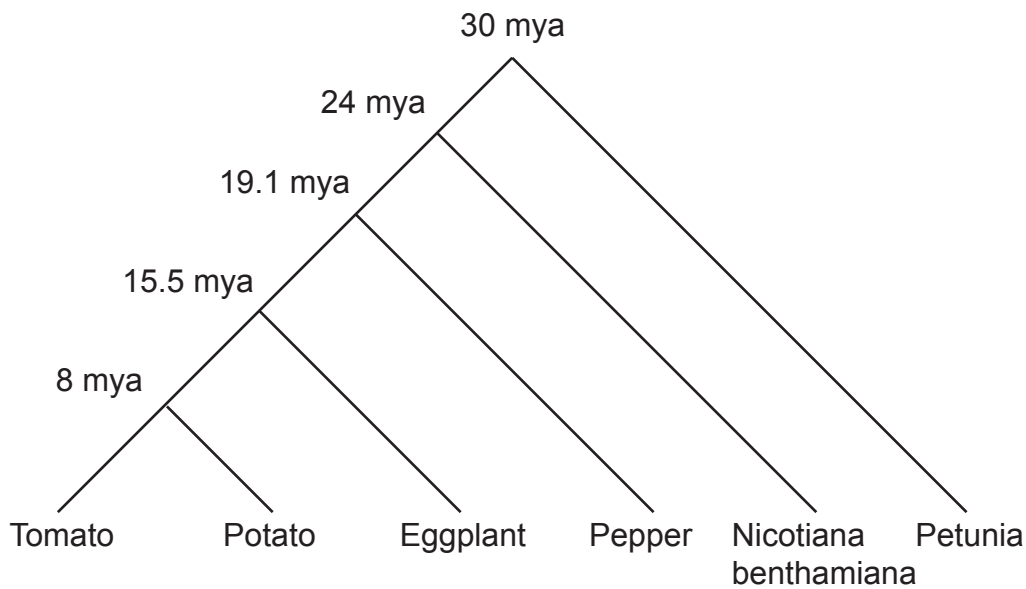**B**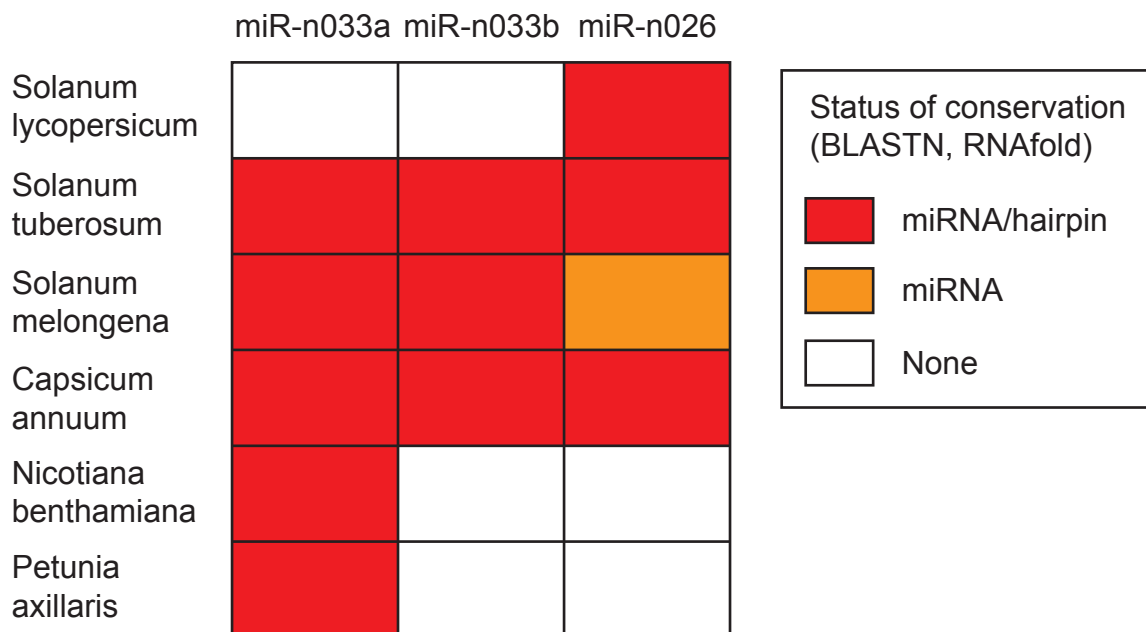

## Figure S10. Conservation of miR-n033 and miR-n026 in Solanaceous species

(A) Evolutionary distances between Solanaceous species

(B) Conservation status of miR-n026 and miR-n033 in Solanaceous species. Homologous region of miRNA was identified using BLASTN (default option) and hairpin structure was predicted using RNAfold. Red color indicates that both sequences of miRNA-homologous region including mature miRNA and hairpin structure are conserved. Orange color indicates that sequences of miRNA-homologous region including mature miRNA is conserved, but hairpin structure is not because of insertion.
