# Supplementary material for: Genome-wide comparative analysis in Solanaceous species reveals evolution of microRNAs targeting defense genes in Capsicum spp
Source: PubMed Central journal article supplement — DNA Res. 2018 Jul 27;25(6):561–75. doi: 10.1093/dnares/dsy025 (PMC6289781; doi:10.1093/dnares/dsy025), 2018-07-27
Supplement: dsy025_supplementary_figure_11.pdf [file dsy025_supplementary_figure_11.pdf]

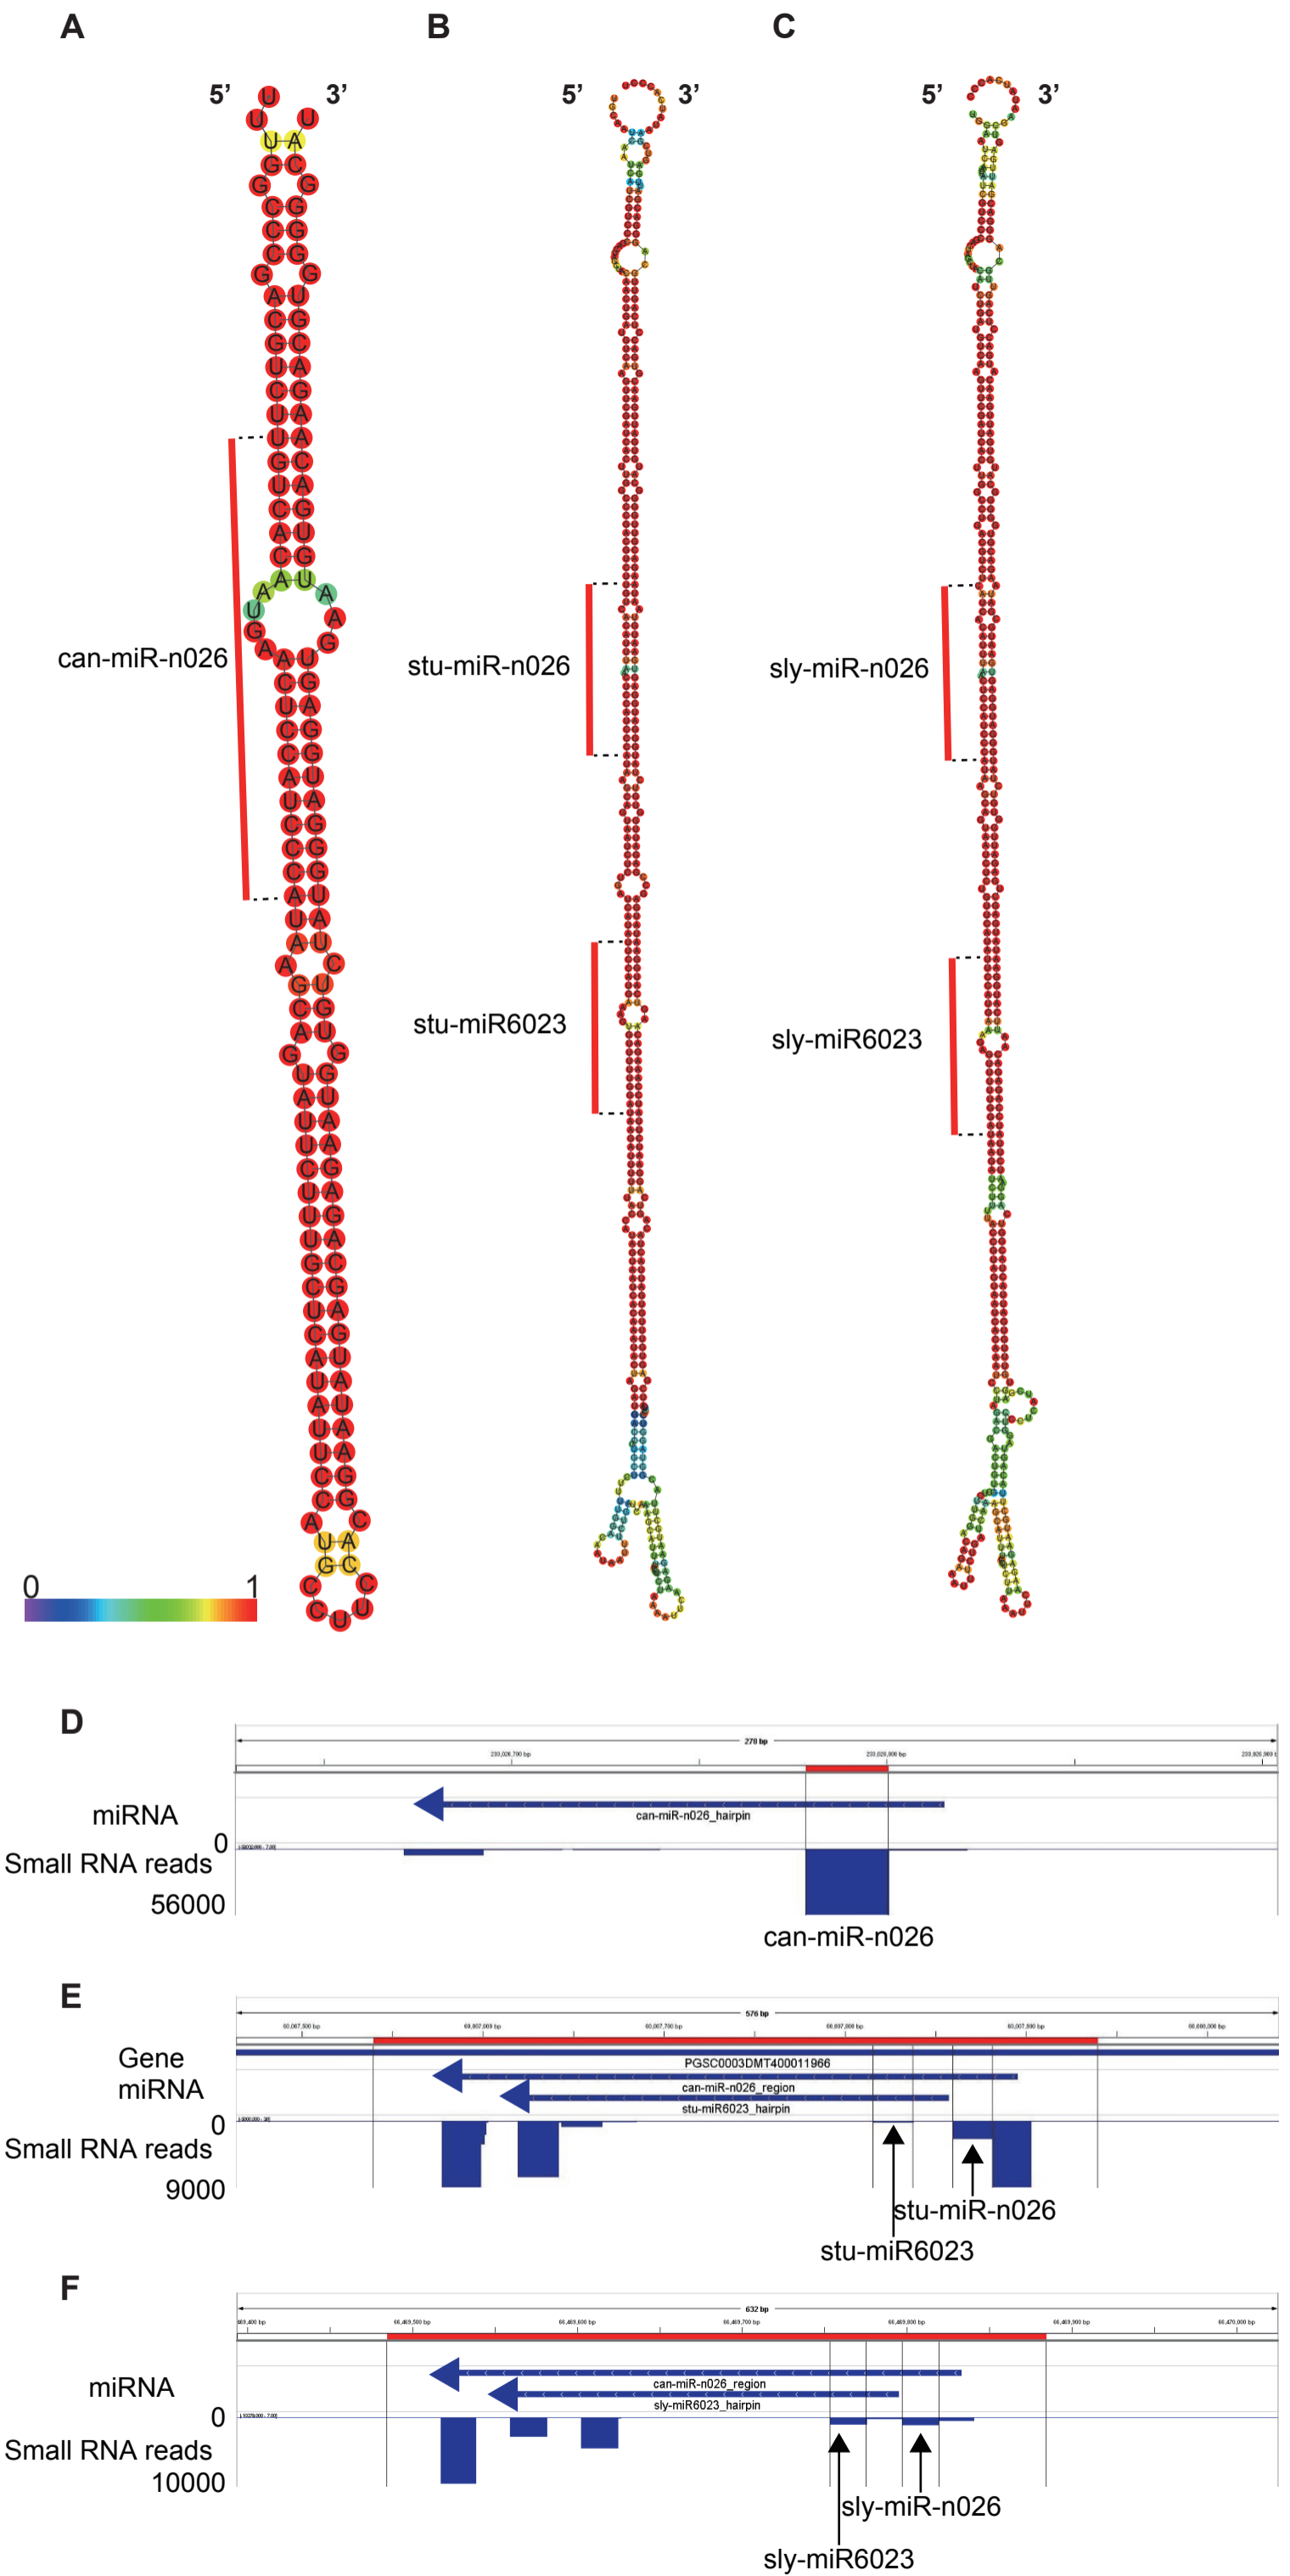

**Figure S11. The hairpin structures of miR-n026 and their expression**

The hairpin structures of (A) can-miR-n026, (B) stu-miR-n026 and (C) sly-miR-n026, respectively. Color indicates the possibility of base-pairing. (D-F) Small RNA mapping results on the homologous region of miR-n026 in pepper, potato and tomato, respectively.
