# Supplementary material for: Genome-wide comparative analysis in Solanaceous species reveals evolution of microRNAs targeting defense genes in Capsicum spp
Source: PubMed Central journal article supplement — DNA Res. 2018 Jul 27;25(6):561–75. doi: 10.1093/dnares/dsy025 (PMC6289781; doi:10.1093/dnares/dsy025), 2018-07-27
Supplement: dsy025_supplementary_figure_12.pdf [file dsy025_supplementary_figure_12.pdf]

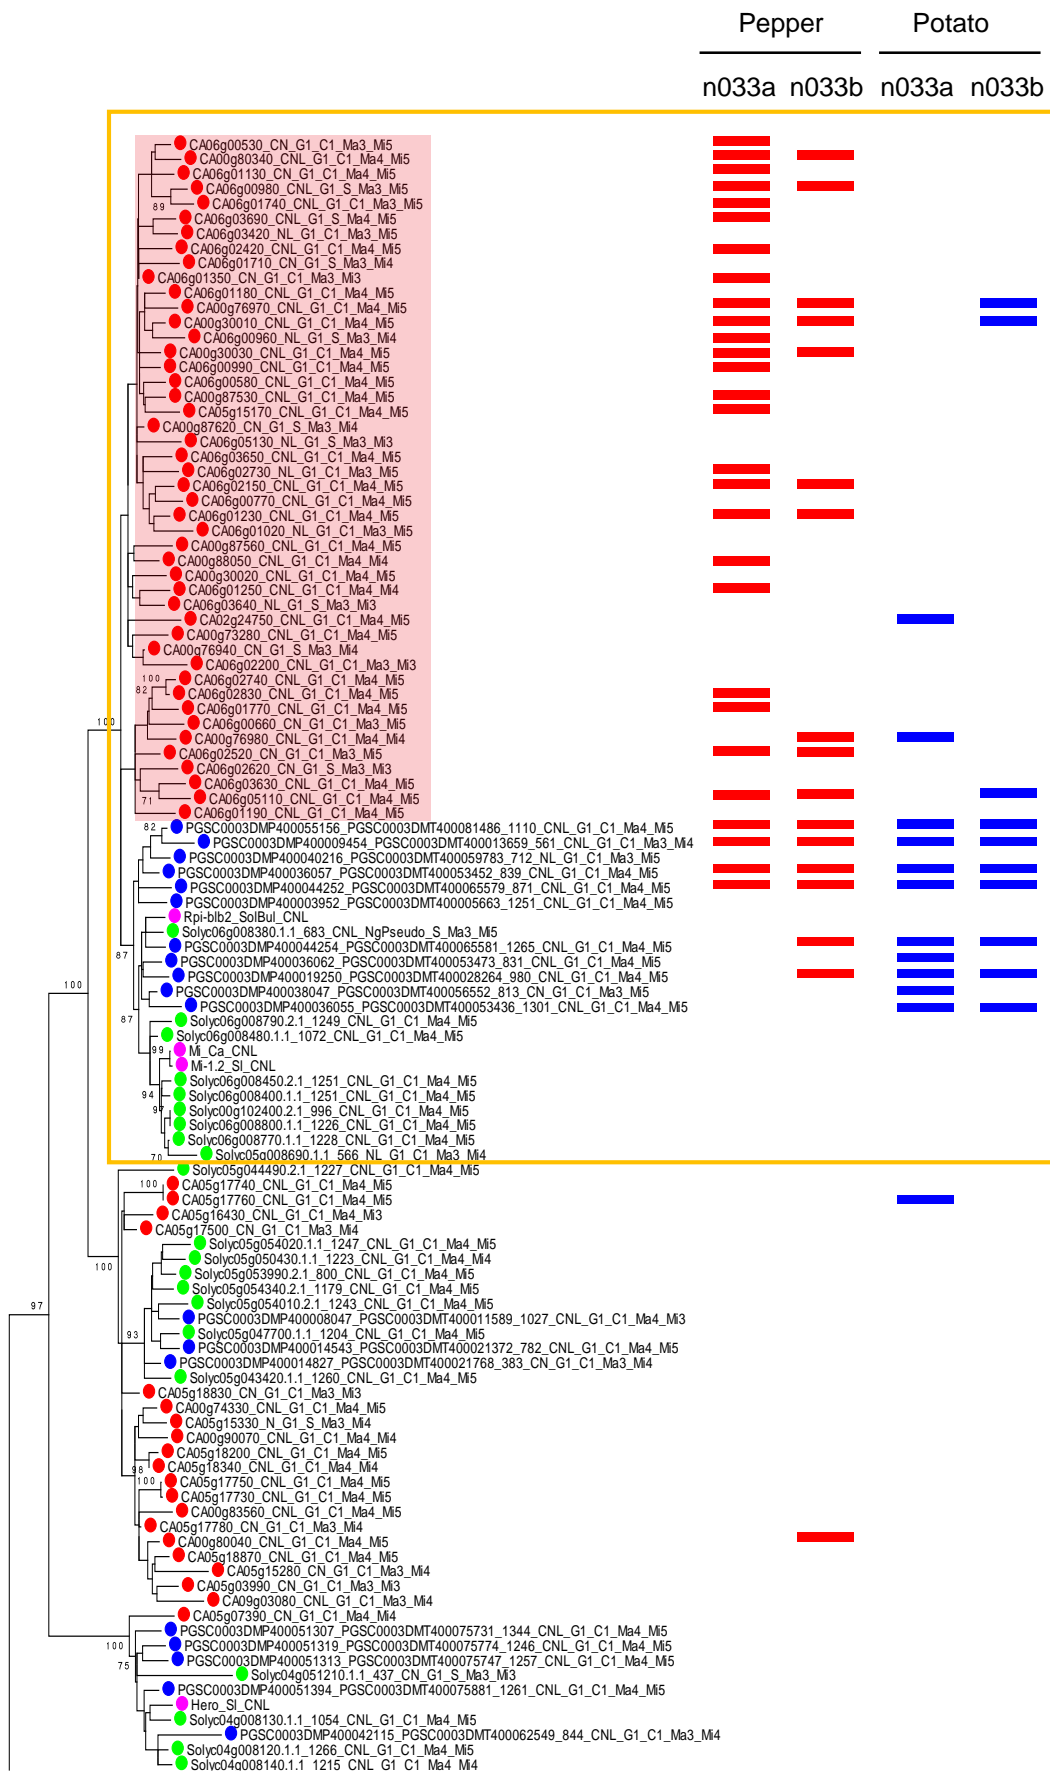

**Supplementary Figure 12.** Phylogenetic relationships of whole CNL-G1 in pepper, tomato and potato. The part in yellow boundary corresponds with Fig. 7b. Red boxes indicate the predicted target CNL-G1 of can-miR-n033. Blue boxes indicate the predicted target CNL-G1 of stu-miR-n033. Note, some CNL-G1 NLRs were excluded in the tree, because their NB-domain did not satisfy the criteria to construct a phylogenetic tree.
