# Supplementary material for: Genome-wide comparative analysis in Solanaceous species reveals evolution of microRNAs targeting defense genes in Capsicum spp
Source: PubMed Central journal article supplement — DNA Res. 2018 Jul 27;25(6):561–75. doi: 10.1093/dnares/dsy025 (PMC6289781; doi:10.1093/dnares/dsy025), 2018-07-27
Supplement: dsy025_supplementary_figure_13.pdf [file dsy025_supplementary_figure_13.pdf]

## miR-n026

```
sly-miR-n026    5' CAUCACAUUUAACUCCAUCCCA 3'
                ||||| | |||||
can-miR-n026    5' UGUCACAAUGAACUCCAUCCCA 3'
                ||||| | |||||
stu-miR-n026    5' UGUCACAUUUAACUCCAUCCCA 3'
```

**Figure S13. Alignment of mature miR-n026 sequences**
